# Supplementary material for: Unexpected and selective formation of an (e,e,e,e)-tetrakis-[60]fullerene derivative via electrolytic retro-cyclopropanation of a D2h-hexakis-[60]fullerene adduct
Source: Royal Society of Chemistry journal article supplement (doi:10.1039/c0jm00754d), 2010-05-21

Supplementary Information

**Unexpected and selective formation of an (*e,e,e,e*)-*tetrakis*-[60]fullerene derivative *via* electrolytic retro-cyclopropanation of a *D*<sub>2h</sub>-*hexakis*-[60]fullerene adduct**

Angy L. Ortiz,<sup>a</sup> and Luis Echegoyen<sup>\*a</sup>

|                                                                                                                |    |
|----------------------------------------------------------------------------------------------------------------|----|
| 1. Scheme 1. Synthesis of compound <b>4</b> .....                                                              | S2 |
| 2. UV- <i>vis</i> spectrums of compounds <b>1</b> , <b>3</b> and <b>4</b> .....                                | S2 |
| 3. MALDI-TOF MS spectrums of: a) reaction crude after CPE of compound <b>3</b> and b) compound <b>4</b> .....  | S2 |
| 4. <sup>1</sup> H-NMR of compound <b>4</b> .....                                                               | S3 |
| 5. <sup>13</sup> C-NMR of compound <b>4</b> .....                                                              | S3 |
| 6. HMBC-NMR of compound <b>4</b> .....                                                                         | S4 |
| 7. <sup>1</sup> H-NMR spectrums of: a) compound <b>3</b> ; b) compound <b>4</b> and c) compound <b>5</b> ..... | S5 |
| 8. <sup>1</sup> H-NMR spectrums before and after CPE of compound <b>4</b> .....                                | S5 |

1. **Scheme 1.** Retro-cyclopropanation of **3** by control potential electrolysis (CPE). i) Pyridine glycine, paraformaldehyde, *o*-dichlorobenzene, reflux, Ar.

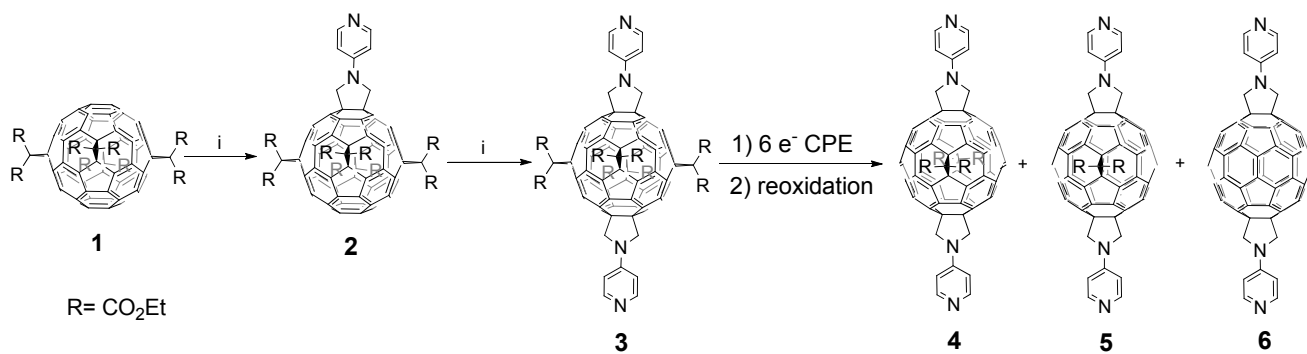

2. UV-vis spectrums of compounds **1**, **3** and **4** in CH<sub>2</sub>Cl<sub>2</sub>.

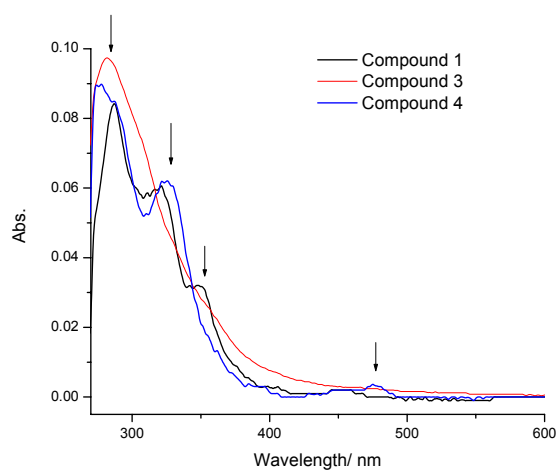

3. MALDI-TOF MS spectrums: a) compound **4** and b) reaction crude after CPE of **3**. *m/z*: 1277 (- 2 malonates groups); 1119 (- 3 malonates groups) and 960 (- 3 malonates groups).

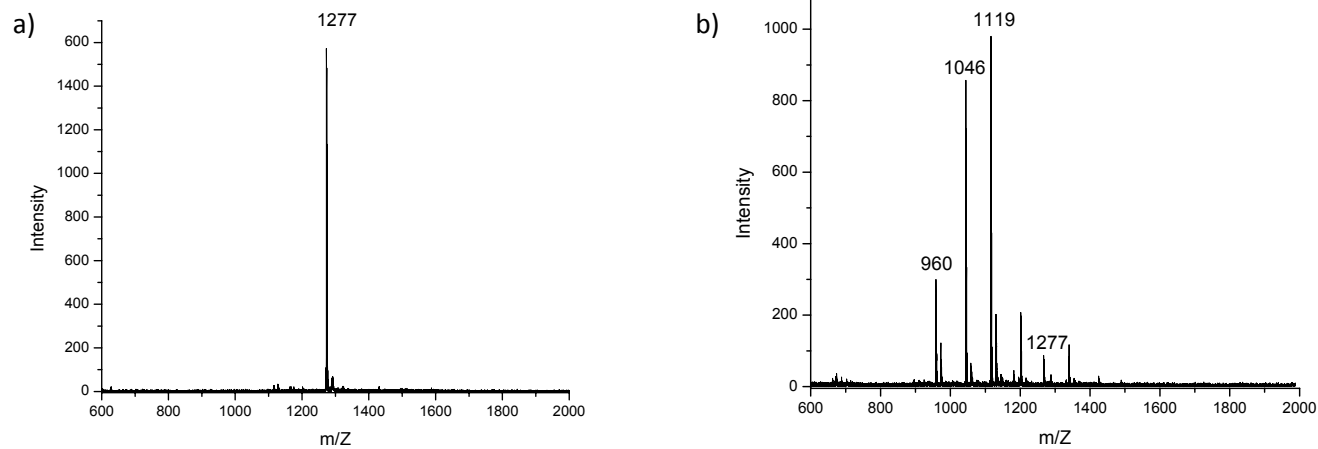4.  $^1\text{H-NMR}$  of compound **4**.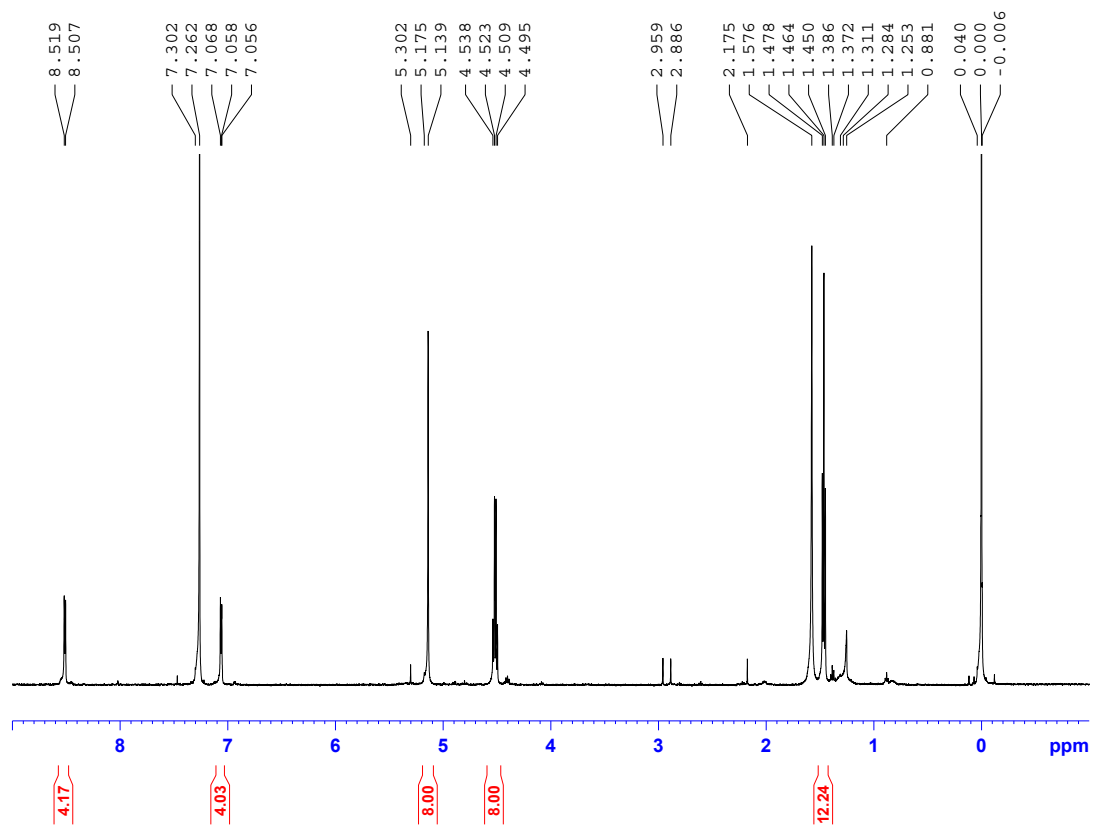5.  $^{13}\text{C-NMR}$  of compound **4**.

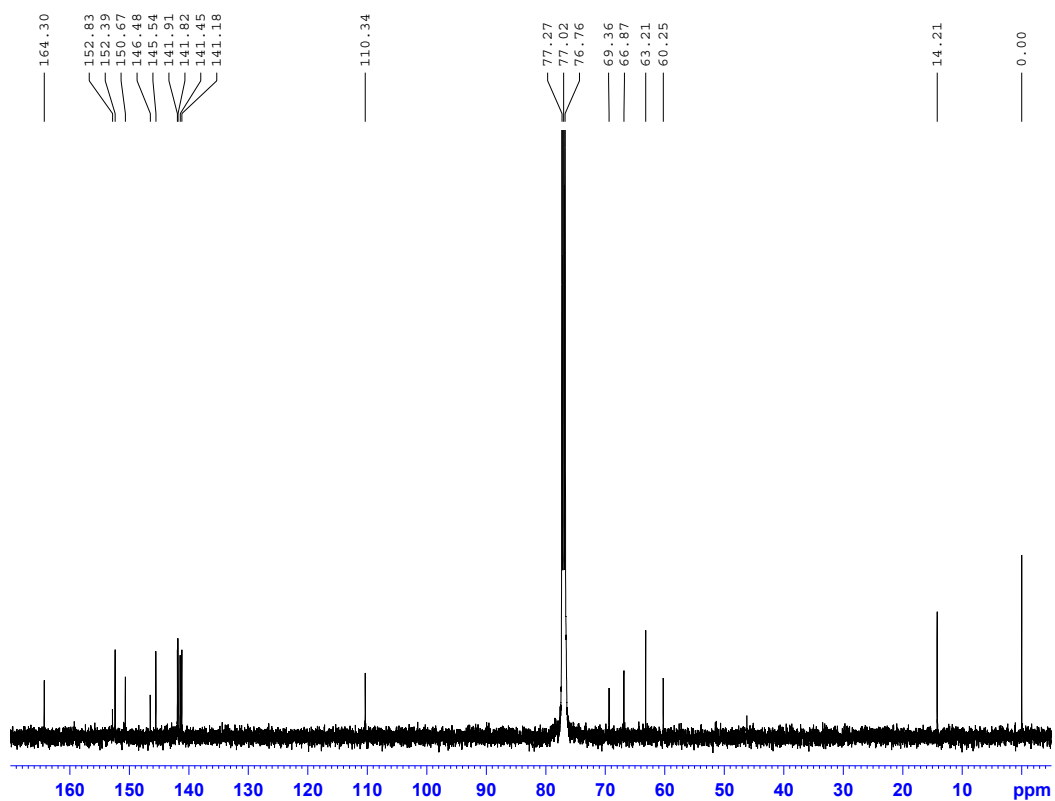

6. HMBC-NMR of compound 4.

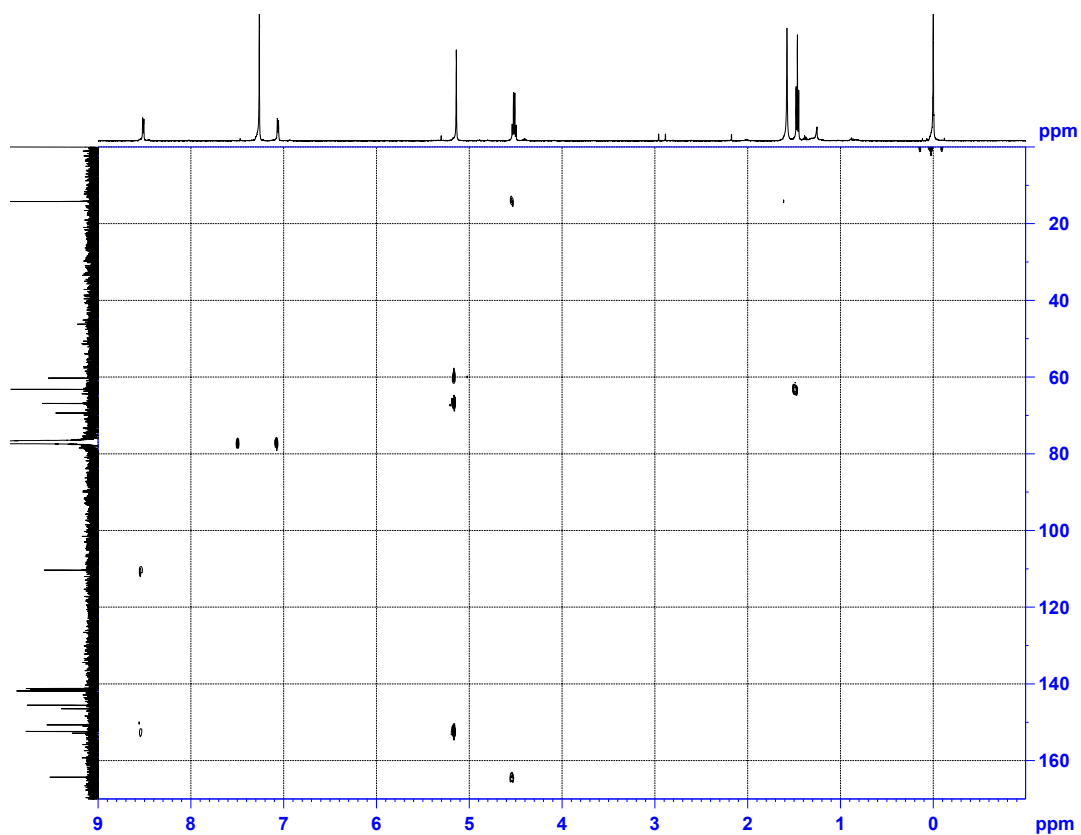

7.  $^1\text{H}$ -NMR spectrums of: a) compound **3**; b) compound **4** and c) compound **5**.

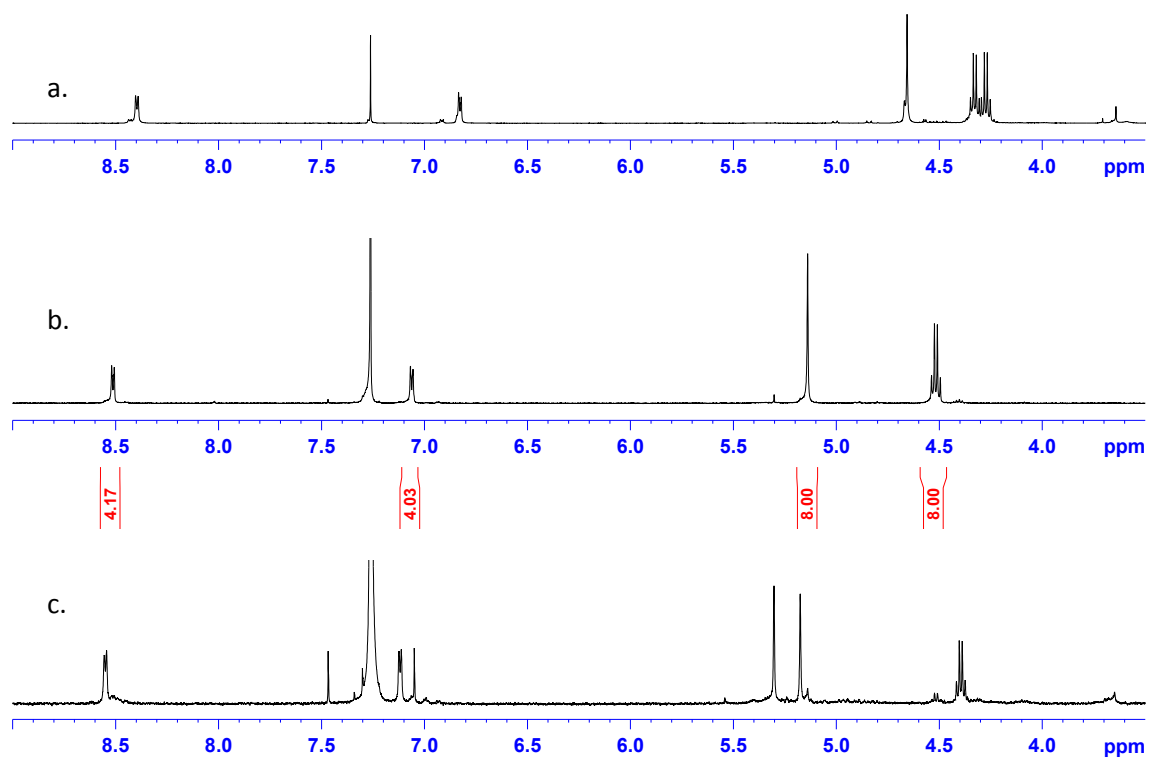

8.  $^1\text{H}$ -NMR spectrums before and after CPE of compound **4**.

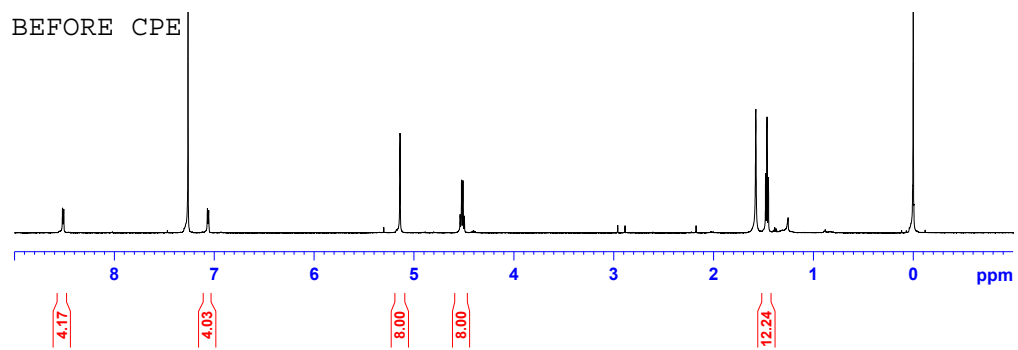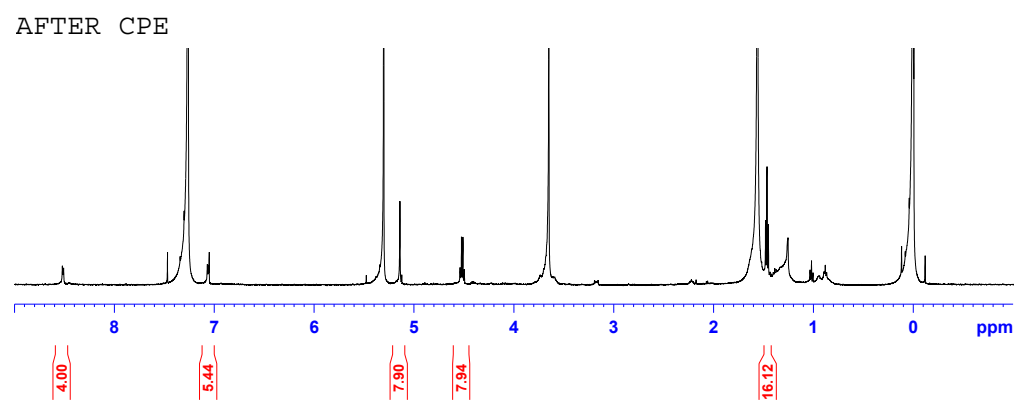

Supplement: c0jm00754d.pdf [file c0jm00754d.pdf]
